# Supplementary material for: The Aspirations of Direct Aspiration for Thrombectomy in Ischemic Stroke: A Critical Analysis
Source: PubMed Central journal article supplement — J Stroke. 2019 Jan 31;21(1):2–9. doi: 10.5853/jos.2018.02026 (PMC6372897; doi:10.5853/jos.2018.02026), 2019-01-31
Supplement: jos-2018-02026-suppl.pdf [file jos-2018-02026-suppl.pdf]

## Supplementary material

### Fundamental equations<sup>8</sup>

| Parameter                   | Superiority trial                                                                               | Inferiority trial                                                                                   |
|-----------------------------|-------------------------------------------------------------------------------------------------|-----------------------------------------------------------------------------------------------------|
| Purpose                     | Intervention is 'better' than control                                                           | Intervention is 'not worse' than control                                                            |
| H0 (null hypothesis)        | $H_0: \mu_i - \mu_c = \delta$                                                                   | $H_0: \mu_i - \mu_c = \delta$<br>Or<br>$H_0: \mu_c - \mu_i = \delta$                                |
| Meaning                     | Intervention is better than control by a clinically admissible margin, delta                    | Intervention is worse than control by a clinically admissible margin, delta                         |
| H1 (alternative hypothesis) | $H_1: \mu_i - \mu_c > \delta$                                                                   | $H_1: \mu_i - \mu_c > -\delta$                                                                      |
| Meaning                     | Intervention is better than control by at least delta (a clinically admissible margin)          | Intervention is NOT worse than control by delta (a clinically admissible margin), and can be better |
| Test statistic              | $z = \frac{(d - \delta)}{\sigma}$                                                               | $z = \frac{(d - \delta)}{\sigma}$                                                                   |
| Difference                  | Difference in effectiveness, $\mu_i - \mu_c$                                                    | Difference in effectiveness, $\mu_i - \mu_c$                                                        |
| N, sample size              | $N = 2 \times \left[ \frac{Z_{1-\alpha} + Z_{1-\beta}}{\delta - \delta_0} \right]^2 \times s^2$ | $N = 2 \times \left[ \frac{Z_{1-\alpha} + Z_{1-\beta}}{\delta_0} \right]^2 \times s^2$              |

### Type 1 error, type 2 error, power

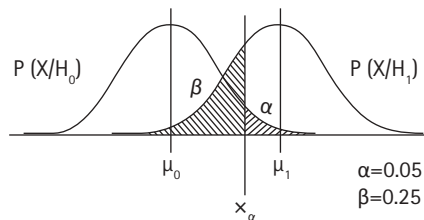

$\alpha$  Type I error: rejecting the null hypothesis when it's actually true usually 0.05, usually 2-sided

$\beta$  Type II error: unable to reject H0 when it should be rejected

Power =  $1 - \beta$ , usually set to 0.8

### ASTER trial calculations

|                |                                        |
|----------------|----------------------------------------|
| $\delta$       | Expected clinical difference - 15%     |
| $\delta_0$     | Clinically significant difference - 5% |
| $\alpha$       | 0.05                                   |
| $\beta$        | 0.20                                   |
| $Z_{1-\alpha}$ | 1.645                                  |
| $Z_{1-\beta}$  | 0.842                                  |
| $N_{CS}$       | Sample size, clinical superiority      |
| $N_{NI}$       | Sample size, non-inferiority           |

ASTER, Direct Aspiration First Pass Technique for Thrombectomy Revascularization of Large Vessel Occlusion in Acute Ischemic Stroke.

Sample size calculations<sup>9</sup>

$$\frac{N_{CS}}{N_{NI}} = \frac{2 \times \left[ \frac{Z_{1-\alpha} + Z_{1-\beta}}{\delta - \delta_0} \right]^2 \times s^2}{2 \times \left[ \frac{Z_{1-\alpha} + Z_{1-\beta}}{\delta_0} \right]^2 \times s^2}$$

$$\frac{N_{CS}}{N_{NI}} = \frac{2 \times \left[ \frac{Z_{1-\alpha} + Z_{1-\beta}}{\delta - \delta_0} \right]^2 \times s^2}{2 \times \left[ \frac{Z_{1-\alpha} + Z_{1-\beta}}{\delta_0} \right]^2 \times s^2}$$

$$\frac{N_{CS}}{N_{NI}} = \frac{[\delta_0]^2}{[\delta - \delta_0]^2}$$

$$\frac{N_{CS}}{N_{NI}} = \frac{[0.05]^2}{[0.15 - 0.05]^2}$$

$$\frac{N_{CS}}{N_{NI}} = \frac{[0.05]^2}{[0.1]^2}$$

$$\frac{N_{CS}}{N_{NI}} = \frac{0.0025}{0.01}$$

$$\frac{N_{CS}}{N_{NI}} = \frac{25}{100} = \frac{1}{4}$$

$$N_{NI} = 4 \times N_{CS}$$
